# Supplementary material for: The application of soil-based biochar and foliar chitosan enhances the biochemical traits and oil composition of yarrow (Achillea millefolium L.) under varying moisture levels
Source: Research Square preprint supplement (doi:10.21203/rs.3.rs-5868943/v1), 2025-04-03
Supplement: Supplementary file 1 [file 1a5647ca35ff0b6742efe74d.xlsx]

## Sheet: Sheet1
Replication	Year	Irrigation	Biochar	Chitosan	Biological Yeild	Flower Yield	CAT	Proline	Ascorbate Peroxidase	DPPH	Peroxidase	Essential oil content	Essential oil yield	Terpinen-4-ol	Myrcene	Borneol	1,8-cineole	Camphor	β-Pinene	α-Pinene	Bornyl acetate	Camphene	Verbenol <trans->	Cymene	α –Phellandrene	Sabinene	Pinocarveol	Nerolidol	Bisabolene	Germacrene-D	Guaiol	Caryophyllene oxide	α-Calacorene	Cadinene <δ->	Longifolene	Bisabolene <(cis)-α->	Curcumene <ar->	Spathulenol	Chamazulene
1	1	1	1	1	7642.88	1133.8	5.965	12.1426	11.099	25.4805	5.47288	0.272349	3.37133	1.464	3.6003	4.64857	9.69358	2.40984	1.45129	8.85976	2.1425	0.675557	0.137803	0.288262	2.05037	1.74153	0.749945	8.6141	5.03142	1.26029	4.9934	11.4304	1.85051	1.44304	0.583305	1.93561	2.49844	1.31	3.88447
1	1	1	1	2	8369.86	1226.04	7.34176	19.899	13.3423	32.6268	5.94789	0.293127	3.59386	2.04805	3.79134	5.79323	10.2594	3.23318	1.69736	9.66234	2.695	0.652697	0.173339	0.332822	2.16456	1.85237	0.90275	8.37877	5.79019	1.29775	5.08559	11.6368	1.9434	1.62368	0.718236	1.90846	2.72481	1.51	5.02327
1	1	1	2	1	8611	1254.88	5.94485	18.9952	15.3785	31.4595	5.15982	0.322879	4.05175	1.9734	3.99766	5.61887	10.207	3.11534	1.6382	9.82024	2.5715	1.0079	0.205595	0.258895	1.97512	1.95298	0.88088	8.23188	5.95746	1.22466	5.15416	12.3624	2.01943	1.97624	0.831328	1.95624	2.6193	1.5	4.33327
1	1	1	2	2	9219.87	1293.61	7.25729	20.9326	16.3707	34.9903	6.10092	0.330167	4.27108	2.0044	3.90942	4.68227	9.3925	3.47178	1.84239	9.48559	2.81587	0.887881	0.221313	0.347178	1.19234	0.993008	0.889961	8.38759	6.51788	1.26063	5.24983	13.0328	2.54029	2.23328	0.91378	2.00393	3.4476	1.45	5.35627
1	1	2	1	1	5782.22	801.548	7.56652	23.4766	17.5355	38.7491	6.0314	0.338545	2.7136	2.29468	4.09911	6.27809	12.8497	5.44763	2.40151	10.1012	3.72775	1.34828	1.24876	1.34966	2.21616	2.09101	2.24622	6.10421	3.76756	0.917909	2.21021	9.9288	1.45004	1.19288	0.580046	1.40308	1.19699	1.13	2.57985
1	1	2	1	2	6459.33	901.319	8.92282	26.3375	20.5553	43.4977	6.83984	0.345289	3.11216	2.86496	4.18076	8.71054	13.2585	5.89084	2.55427	10.8202	4.922	1.07687	1.28403	1.4255	2.37897	2.32965	2.38715	5.72622	4.32167	1.08314	2.61156	9.3088	1.69944	1.57504	0.702633	1.51205	1.45409	1.27	2.89423
1	1	2	2	1	5984.78	832.163	8.68039	24.601	18.1374	40.2062	6.70308	0.33341	2.77452	2.7397	4.03693	9.38481	13.1081	6.02941	2.48859	10.3218	4.4715	1.40992	1.2966	1.41267	2.34609	2.71183	2.41822	5.34868	4.51926	1.04977	2.90707	8.6832	1.49975	1.36832	0.636323	1.53324	1.68745	1.23	2.70341
1	1	2	2	2	7105.97	938.156	9.48146	32.721	22.3844	46.6787	7.155	0.381673	3.58068	3.1536	4.98453	6.39993	11.5872	6.2155	2.69135	11.3019	4.276	1.3549	0.276378	0.44606	2.45473	2.55068	1.51331	6.88053	4.97457	1.16002	3.81058	10.7504	2.17327	1.43088	0.656391	1.48805	1.80117	1.34	3.59571
1	1	3	1	1	3629.65	501.552	9.86123	35.3487	24.6104	53.6104	7.3674	0.390399	1.95805	3.18964	4.60587	10.478	14.8499	3.85125	2.57199	12.784	5.1345	1.4219	1.29905	1.50592	2.55353	2.08122	2.01148	4.10585	2.93151	0.749653	0.9114	7.856	0.932285	0.6856	0.417323	1.57138	1.93467	0.85	1.11457
1	1	3	1	2	4617.52	672.912	10.4822	45.7118	24.4297	60.3253	7.71956	0.418642	2.7498	3.67066	4.94783	10.5927	15.1082	4.33062	2.8957	12.584	5.3575	1.63931	1.35798	1.50802	2.59044	2.20877	2.15109	4.82988	3.23064	0.865536	1.31138	8.2288	0.991893	0.8624	0.474036	1.669	1.98979	0.96	2.1867
1	1	3	2	1	4461.23	648.387	9.71862	39.4327	23.5091	58.0008	7.28879	0.428976	2.65175	3.87669	5.07297	11.8494	14.721	3.99835	3.16288	12.936	5.199	1.51374	1.34339	1.46761	2.48689	2.16955	2.11439	4.32638	3.1129	0.67328	1.65757	5.624	1.10372	1.02288	0.525514	1.60133	2.28076	0.95	2.08739
1	1	3	2	2	4709.18	722.57	12.8359	48.742	30.7362	64.5484	7.79717	0.434568	3.14006	4.13197	5.74607	14.6973	15.2352	4.50762	3.60539	13.2872	6.979	2.0035	1.45788	1.49375	2.55386	2.29915	2.23566	0.901102	3.16179	0.902869	1.98727	1.0108	1.35384	1.10108	0.550599	1.7344	1.89956	1.08	2.30028
2	1	1	1	1	7693.07	1161.11	6.15597	14.5034	11.4959	36.3264	5.54126	0.301845	3.71376	2.09918	3.63053	6.42303	9.09065	3.42029	1.49482	9.36643	2.24025	0.706379	0.14409	0.294677	2.06681	1.76114	0.990979	7.81536	5.10015	1.27189	5.07266	11.648	1.88471	1.8648	0.846905	1.74708	2.71176	1.42	4.19994
2	1	1	1	2	8657.84	1255.41	7.22582	12.5276	13.4803	31.69	5.88248	0.320675	4.02578	1.98814	3.88274	5.65329	10.1874	3.13861	1.7125	9.52048	2.729	1.05756	0.175526	0.326686	2.14883	1.85919	0.885198	8.38414	6.12321	1.35398	5.25695	12.1808	2.0004	1.91808	0.812672	1.97633	2.8237	1.51	5.16159
2	1	1	2	1	8917.97	1299.62	7.53707	19.8259	14.9989	32.4389	6.05807	0.328951	4.2751	2.03603	4.01114	5.76517	10.7484	3.21422	1.59656	10.2391	2.478	0.978415	0.199581	0.343158	2.19104	1.93422	0.89923	8.45081	6.1971	1.41026	5.36836	13.0424	2.09069	2.04424	0.853141	2.00002	2.6984	1.5	4.44392
2	1	1	2	2	9465.44	1329.4	8.12981	21.2347	16.6899	37.7566	6.63627	0.33128	4.40404	2.45522	3.98294	5.73539	10.3806	3.75105	1.89789	9.6339	2.8945	1.30681	0.22637	0.397398	1.32103	1.00878	1.02205	8.24607	6.6897	1.28964	5.68697	13.0872	2.54599	2.23872	0.915525	2.03894	3.45551	1.45	5.36733
2	1	2	1	1	5984.82	831.073	8.56197	23.9549	18.1049	40.1544	6.65481	0.341171	2.83538	2.47829	4.1309	6.49558	12.847	5.57887	2.43748	10.3139	3.868	1.37374	1.25778	1.40814	2.33449	2.6062	2.25899	6.2082	3.90931	1.03799	2.2916	10.3776	1.49707	1.23776	0.594442	1.47187	1.24247	1.15	2.63241
2	1	2	1	2	6533	912.055	8.98607	25.7837	20.7623	44.0087	6.87552	0.349227	3.18515	2.89763	4.22845	8.78687	13.2978	6.03193	2.60402	10.8976	5.024	1.31816	1.28922	1.42884	2.38755	2.51422	2.44901	5.60581	4.40328	1.09184	2.64583	9.472	1.71654	1.60768	0.713104	1.49279	1.46991	1.26	2.83337
2	1	2	2	1	6101.43	849.162	8.78053	24.8024	19.4803	41.0153	6.75957	0.368603	3.13004	2.79144	4.46305	9.53747	13.1702	6.24435	2.5113	10.4443	4.5225	1.426	1.29988	1.41796	2.35967	2.71524	2.45811	5.39247	4.5708	1.06355	2.81282	8.9416	1.61066	1.39416	0.644612	1.59011	1.64395	1.24	2.72554
2	1	2	2	2	7253.31	959.628	9.60795	33.1867	22.7985	47.7007	7.22636	0.386357	3.7076	3.21895	4.31478	6.52079	11.6657	6.38745	2.58775	11.4567	4.35675	1.7812	0.363336	0.452754	2.47188	2.59331	1.54522	6.9681	5.07766	1.17743	3.87912	11.0768	1.68983	1.4472	0.661626	1.50818	1.83776	1.34	3.64689
2	1	3	1	1	4732.46	711.854	9.8293	38.2194	17.0138	53.9586	7.48633	0.407825	2.90312	3.23321	5.05902	10.5798	14.8301	3.99311	2.88479	11.3953	5.2025	1.83748	1.38382	1.49808	2.56496	2.11053	2.0378	4.90696	3.1821	0.766336	0.893172	8.1688	0.907397	0.71688	0.427357	1.60027	1.99993	0.86	1.81357
2	1	3	1	2	4482.46	653.229	10.8908	46.9705	25.2925	62.4544	7.95007	0.421769	2.68979	3.88177	5.10678	11.0858	15.239	4.38221	2.97141	13.0839	5.30825	1.69291	1.37165	1.52964	2.64585	2.219	2.16067	4.0105	3.13614	0.849579	1.05692	7.9296	0.990539	0.87328	0.477526	1.67951	2.02736	1.12	1.37666
2	1	3	2	1	4602.44	668.965	11.5322	40.4397	24.1993	61.3021	8.31192	0.435386	2.77878	4.01285	5.27165	13.1764	15.8465	4.08002	3.25752	13.2584	5.369	1.97488	1.35433	1.56359	2.73283	2.18575	2.12955	2.72371	3.21169	0.892416	1.79894	5.7328	1.11512	0.99296	0.515917	1.61797	2.30449	0.95	2.17867
2	1	3	2	2	5725.6	780.694	12.4413	48.8427	30.8053	66.2516	7.71357	0.435881	3.4029	4.24089	5.76197	14.9517	15.4888	4.61079	3.61296	13.5451	6.996	2.403	1.45897	1.5049	2.58245	2.31961	2.25481	0.96678	3.87293	1.03347	2.03868	1.2624	1.36021	1.12624	0.55867	1.75541	2.0287	1.08	2.33348
3	1	1	1	1	7718.71	1164.85	5.86611	16.3667	10.5468	30.8609	5.37773	0.29518	3.4384	1.93512	3.57404	5.52944	9.34363	2.91077	1.39071	9.10665	2.0065	0.632675	0.129056	0.279337	2.0275	1.71424	0.869664	7.06293	5.15169	1.2806	4.927	11.8112	1.84481	1.68112	0.736661	1.84858	2.64466	1.38	4.09753
3	1	1	1	2	8782.54	1279.88	7.48933	17.3303	13.394	33.8191	6.03114	0.318713	4.07914	2.12429	3.85897	5.97134	10.3509	3.35355	1.70304	9.84289	2.70775	0.853787	0.174159	0.340632	2.18457	1.85493	0.925089	8.4936	6.14469	1.35761	5.25519	12.1752	1.99982	1.83752	0.78683	1.9807	2.86325	1.51	5.21692
3	1	1	2	1	9040.75	1317.51	6.73569	18.1897	15.8616	30.0969	5.60597	0.317792	4.18695	1.88626	4.00803	5.41531	10.3967	2.97778	1.6912	9.83407	2.6905	1.04542	0.213249	0.300748	2.08237	1.97686	0.85535	8.44856	6.27057	1.3501	5.45404	13.3144	2.1192	2.07144	0.861866	2.01752	2.69759	1.5	4.44278
3	1	1	2	2	9462.92	1329.03	7.56311	21.9899	16.1032	35.0816	6.22439	0.331023	4.3994	2.16241	3.84783	5.0514	9.88327	3.481	1.78974	9.07925	2.75	1.06418	0.217076	0.358761	1.22203	0.979792	0.936258	8.57343	6.68793	1.28934	5.70839	13.0552	2.55312	2.24552	0.917707	2.03858	3.4654	1.45	5.38116
3	1	2	1	1	5585.76	772.918	7.83189	23.4263	16.9833	37.3865	6.3351	0.33953	2.62429	2.30129	4.11103	6.31317	12.8701	5.59682	2.39773	9.89482	3.59175	1.3456	1.24002	1.37815	2.25764	2.36566	2.26856	6.09327	3.63011	0.96	2.20164	9.4936	1.40443	1.14936	0.566086	1.4366	1.1337	1.12	2.57431
3	1	2	1	2	6717.18	938.896	9.14417	27.0424	21.28	45.2861	6.96472	0.359073	3.37132	2.97932	4.34766	8.9777	13.3959	6.14952	2.53325	11.091	4.905	1.13252	1.28348	1.43721	2.40899	2.46371	2.453	5.87947	4.31308	1.1136	2.83441	9.88	1.7593	1.5696	0.700888	1.53656	1.46002	1.29	2.97169
3	1	2	2	1	5972.5	830.374	8.66985	25.9105	19.1687	40.1211	6.69713	0.361711	3.00356	2.73425	4.3796	9.35936	14.1105	6.33032	2.56809	10.3089	4.65	1.4662	1.30808	1.41211	2.34466	2.7195	2.47407	5.6334	4.69966	1.04832	3.02702	8.656	1.58493	1.3656	0.63545	1.53512	1.74283	1.23	2.84731
3	1	2	2	2	7081.41	934.577	9.46038	32.3308	22.3154	46.5084	7.14311	0.378764	3.53984	3.14271	4.58608	6.38721	11.5741	6.38568	2.5969	11.2761	4.2675	1.54661	0.315483	0.444944	2.45187	2.61036	1.5449	6.76548	4.95739	1.15712	3.72053	10.696	1.56167	1.488	0.674713	1.46004	1.77052	1.34	3.55284
3	1	3	1	1	4174.92	605.809	9.89254	37.2875	23.7303	54.1364	7.4851	0.405675	2.45762	3.26588	4.91192	10.6561	14.8693	3.71369	2.76625	12.1429	5.2535	1.65649	1.3469	1.50142	2.57354	2.05452	1.98595	5.09618	3.05251	0.726443	1.28755	7.4208	0.902846	0.64208	0.403363	1.54336	1.87138	0.83	1.79854
3	1	3	1	2	4789.42	697.963	10.9171	47.474	25.6376	63.306	7.96493	0.421634	2.87305	3.89539	5.10515	11.1176	15.2377	4.51117	3.01218	13.1161	5.32325	1.69236	1.37711	1.53104	2.64942	2.24458	2.1846	4.65474	3.35091	0.885845	1.37424	8.30096	1.0018	0.86648	0.475345	1.70577	1.98583	1.03	1.90443
3	1	3	2	1	4264.77	619.757	10.8626	40.4293	24.1922	61.515	7.93415	0.431949	2.55308	4.06731	5.35112	13.3036	15.5116	3.98975	3.29538	13.3873	5.36725	1.80461	1.35421	1.52815	2.64202	2.16785	2.1128	3.7679	2.97544	0.782123	1.52048	5.6648	1.108	1.06096	0.537729	1.59958	2.36382	0.97	1.99886
3	1	3	2	2	5065.44	724.489	12.4391	48.9686	30.8916	66.2341	7.74925	0.447522	3.24225	4.23977	5.78184	14.9491	15.5051	4.49042	3.62242	13.5424	7.01725	2.21263	1.46034	1.50479	2.58216	2.29574	2.23247	1.13098	3.41105	0.932992	2.1672	1.8	1.35175	1.08	0.543837	1.7309	1.98249	1.08	2.41647
1	2	1	1	1	7717.05	1163.82	5.9118	12.2518	12.0274	25.2251	5.44547	0.275173	3.4907	1.54414	3.56818	4.60711	9.60711	2.38835	1.44396	8.78252	2.16178	0.669531	0.136574	0.285691	2.03208	1.72599	0.743256	8.69163	5.0767	1.27163	5.03834	11.5333	1.86717	1.46757	0.597304	1.95123	2.52093	1.32703	3.91943
1	2	1	1	2	8264.62	1236.9	7.27628	20.0781	13.2447	32.3411	5.91624	0.295912	3.90791	2.02978	3.75753	5.74156	10.1679	3.20434	1.68784	9.57794	2.71925	0.646875	0.171793	0.329854	2.14525	1.83585	0.894698	8.45418	5.8423	1.30943	5.13136	11.7415	1.96089	1.65128	0.735474	1.92383	2.74933	1.52963	5.06848
1	2	1	2	1	8684.86	1266.18	5.89183	19.1662	15.2627	31.1843	5.1352	0.325947	4.12501	1.9558	3.962	5.56875	10.1159	3.08756	1.62921	9.73265	2.59464	0.998906	0.203761	0.256585	1.9575	1.93556	0.873023	8.30597	6.01107	1.23568	5.20054	12.4737	2.03761	2.00984	0.85128	1.97205	2.64287	1.5195	4.37226
1	2	1	2	2	7945.22	1305.44	7.19255	21.121	16.2461	34.6835	6.06791	0.333304	4.34891	1.98652	3.87455	4.64051	9.30872	3.44081	1.83158	9.40276	2.84122	0.879961	0.219339	0.344081	1.18171	0.984151	0.882023	8.46308	6.57654	1.27197	5.29708	13.1501	2.56315	2.27125	0.935711	2.02016	3.47863	1.46885	5.40447
1	2	2	1	1	4928.71	808.762	7.49903	23.6879	17.4005	38.4089	5.99901	0.341762	2.76267	2.36712	4.06254	6.2221	12.7351	5.39903	2.38571	10.0111	3.7613	1.33625	1.23763	1.33762	2.1964	2.07236	2.22619	6.15915	3.80147	0.926171	2.2301	10.0182	1.46309	1.21316	0.593967	1.41391	1.20776	1.14469	2.60307
1	2	2	1	2	6523.92	909.431	8.84323	26.5745	20.3933	43.115	6.80024	0.348569	3.16843	2.8394	4.14347	8.63284	13.1403	5.83829	2.53711	10.7237	4.9663	1.06727	1.27257	1.41278	2.35775	2.30887	2.36586	5.77776	4.36057	1.09288	2.63506	9.39258	1.71474	1.60182	0.719497	1.52386	1.46717	1.28651	2.92028
1	2	2	2	1	6046.55	839.652	8.60297	24.8224	17.997	39.853	6.66469	0.336578	2.82468	2.71526	4.00092	9.3011	12.9912	5.97563	2.47201	10.2297	4.51174	1.39734	1.28504	1.40007	2.32517	2.68764	2.39665	5.39682	4.55993	1.05922	2.93324	8.76135	1.51325	1.39158	0.651595	1.54524	1.70264	1.24599	2.72774
1	2	2	2	2	7177.07	946.599	9.39689	33.0155	22.2061	46.2677	7.11259	0.385299	3.64543	3.12547	4.94007	6.34285	11.4838	6.16006	2.67296	11.2011	4.31448	1.34281	0.273912	0.442081	2.43283	2.52793	1.49981	6.94245	5.01934	1.17046	3.84487	10.8472	2.19283	1.4552	0.672144	1.49964	1.81738	1.35742	3.62807
1	2	3	1	1	3283.56	506.336	9.77327	35.6668	24.3792	53.1376	7.53213	0.394107	1.99452	3.16119	4.56478	10.3845	14.7174	3.8169	2.55466	12.67	5.18071	1.40922	1.28746	1.49249	2.53075	2.06265	1.99353	4.14281	2.95789	0.7564	0.919603	7.9267	0.940676	0.697255	0.427339	1.58372	1.95208	0.86105	1.1246
1	2	3	1	2	4663.7	678.968	10.3887	46.1232	24.2332	59.7925	7.67211	0.422524	2.79952	3.63791	4.9037	10.4982	14.9734	4.29199	2.87549	12.4717	5.40572	1.62469	1.34586	1.49457	2.56733	2.18907	2.13191	4.87335	3.25972	0.873326	1.32768	8.30286	1.00082	0.877061	0.485413	1.68222	2.0077	0.97248	2.20638
1	2	3	2	1	4492.18	654.222	9.63194	39.7876	23.3208	57.4888	7.24519	0.432862	2.6997	3.84301	5.02772	11.7437	14.5897	3.96268	3.14028	12.8206	5.24579	1.50023	1.33141	1.45452	2.46471	2.1502	2.09553	4.36532	3.14091	0.67934	1.67249	5.67462	1.11366	1.04027	0.538127	1.61395	2.30129	0.96235	2.10617
1	2	3	2	2	4754.37	729.074	12.7214	49.1807	30.4835	63.9779	7.74992	0.438697	3.19684	4.09511	5.69482	14.5662	15.0993	4.46741	3.57885	13.1687	7.04181	1.98562	1.44488	1.48042	2.53108	2.27864	2.21572	0.909212	3.19024	0.910995	2.00516	1.0199	1.36602	1.1198	0.563813	1.74821	1.91666	1.09404	2.32099
2	2	1	1	1	7720.19	1171.2	6.10106	14.634	10.4088	36.0412	5.51324	0.307884	3.66158	2.29698	3.59814	6.36574	9.00956	3.38978	1.48711	9.28467	2.26041	0.700078	0.142805	0.292049	2.04838	1.74543	0.98214	7.88569	5.14605	1.28334	5.11831	11.7528	1.90168	1.8965	0.867231	1.761	2.73617	1.43846	4.23774
2	2	1	1	2	8745.36	1266.88	7.16137	12.6403	13.3815	31.4127	5.85141	0.323722	4.09915	1.9704	3.84811	5.60287	10.0966	3.11061	1.70285	9.43735	2.75356	1.04812	0.17396	0.323772	2.12967	1.84261	0.877302	8.45959	6.17832	1.36617	5.30426	12.2904	2.01841	1.95069	0.832176	1.99231	2.84911	1.52963	5.20805
2	2	1	2	1	9012.96	1311.31	7.46984	20.0044	14.8865	32.1549	6.02544	0.332076	4.3524	2.01787	3.97536	5.71375	10.6525	3.18555	1.58794	10.1478	2.5003	0.969688	0.197801	0.340098	2.1715	1.91697	0.891209	8.52687	6.25287	1.42295	5.41667	13.1598	2.10951	2.07899	0.873616	2.01622	2.72269	1.5195	4.48391
2	2	1	2	2	9547.52	1341.54	8.0573	21.4258	16.5625	37.4252	6.59848	0.334427	4.48427	2.43332	3.94741	5.68424	10.288	3.71759	1.88658	9.54975	2.92055	1.29516	0.224351	0.393854	1.30925	0.999784	1.01293	8.32028	6.7499	1.30125	5.73815	13.205	2.56891	2.27678	0.937498	2.05549	3.48661	1.46885	5.41564
2	2	2	1	1	6045.21	838.552	8.4856	24.1705	17.9648	39.8015	6.61685	0.344412	2.88664	2.45618	4.09405	6.43764	12.7324	5.52911	2.42136	10.2219	3.90281	1.36148	1.24657	1.39558	2.31367	2.58295	2.23884	6.26408	3.9445	1.04734	2.31223	10.471	1.51054	1.2588	0.608709	1.48332	1.25366	1.16495	2.6561
2	2	2	1	2	6598.33	920.263	8.90591	26.0157	20.5985	43.6215	6.8356	0.352545	3.24274	2.87179	4.19073	8.7085	13.1792	5.97813	2.58642	10.8004	5.06922	1.30641	1.27772	1.4161	2.36625	2.49179	2.42716	5.65627	4.44291	1.10167	2.66964	9.55725	1.73199	1.63501	0.730218	1.50442	1.48314	1.27638	2.85887
2	2	2	2	1	6164.37	856.805	8.70221	25.0256	19.328	40.6548	6.72068	0.372105	3.18663	2.76654	4.42324	9.4524	13.0527	6.18865	2.49452	10.3512	4.5632	1.41328	1.28829	1.40532	2.33862	2.69102	2.43619	5.441	4.61194	1.07312	2.83814	9.02207	1.62516	1.41786	0.660082	1.60262	1.65874	1.25612	2.75007
2	2	2	2	2	7325.88	968.265	9.52225	33.4854	22.6166	47.2806	7.18331	0.390028	3.77463	3.19024	4.27629	6.46263	11.5616	6.33048	2.57029	11.3545	4.39596	1.76531	0.360096	0.448715	2.44983	2.57018	1.53144	7.03081	5.12336	1.18803	3.91403	11.1765	1.70504	1.4718	0.677505	1.51996	1.8543	1.35742	3.67971
2	2	3	1	1	4780.91	718.531	9.74162	38.5634	17.178	53.4827	7.43917	0.411699	2.95672	3.20437	5.01389	10.4854	14.6978	3.95749	2.86468	11.2937	5.24932	1.82109	1.37147	1.48472	2.54208	2.09171	2.01963	4.95112	3.21074	0.773233	0.901211	8.24232	0.915564	0.729067	0.437614	1.61287	2.01793	0.87118	1.82989
2	2	3	1	2	4527.28	659.108	10.7936	47.3932	25.0883	61.9027	7.90056	0.425681	2.73843	3.84715	5.06123	10.9869	15.1031	4.34312	2.95053	12.9672	5.35602	1.67781	1.35941	1.516	2.62225	2.19921	2.1414	4.04659	3.16437	0.857225	1.06193	8.00097	0.999454	0.888126	0.488987	1.69282	2.04561	1.13456	1.38905
2	2	3	2	1	4634.8	674.985	11.4293	40.8036	24.0049	60.7607	8.25919	0.419332	2.82903	3.97795	5.22463	13.0589	15.7051	4.04363	3.23408	13.1401	5.41732	1.95727	1.34225	1.54964	2.70846	2.16625	2.11056	2.74822	3.2406	0.900448	1.81513	5.7844	1.12516	1.00984	0.528299	1.63073	2.32523	0.96235	2.19828
2	2	3	2	2	5780.96	787.72	12.3303	49.2823	30.5519	65.666	7.66707	0.440022	3.46443	4.20306	5.71057	14.8184	15.3506	4.56966	3.58635	13.4243	7.05896	2.38156	1.44596	1.49148	2.55942	2.29892	2.2347	0.975482	3.90778	1.04277	2.05703	1.27376	1.37245	1.14539	0.572078	1.76941	2.04696	1.09404	2.35448
3	2	1	1	1	7794.6	1174.97	5.81379	16.514	10.4742	30.591	5.35117	0.297984	3.4995	1.91786	3.54216	5.48012	9.26029	2.8848	1.38393	9.0272	2.02456	0.627031	0.127904	0.276846	2.00942	1.69895	0.861907	7.12649	5.19806	1.29212	4.97134	11.9175	1.86141	1.7097	0.754341	1.86342	2.66846	1.39794	4.13441
3	2	1	1	2	8870.36	1291.4	7.42253	17.4863	13.296	33.5228	5.99875	0.321741	4.1529	2.10534	3.82455	5.91808	10.2586	3.32363	1.69347	9.75688	2.73212	0.846172	0.172606	0.337593	2.16508	1.83838	0.916837	8.57004	6.19999	1.36983	5.30248	12.2848	2.01782	1.86876	0.805714	1.99673	2.88902	1.52963	5.26387
3	2	1	2	1	9127.94	1329.37	6.67561	18.3534	15.7416	29.8338	5.57737	0.320812	4.26265	1.86944	3.97227	5.36701	10.304	2.95122	1.68174	9.74635	2.71471	1.03609	0.211347	0.298065	2.06379	1.95922	0.847721	8.52459	6.327	1.36225	5.50312	13.4342	2.13827	2.10665	0.882551	2.03388	2.72187	1.5195	4.48276
3	2	1	2	2	9544.96	1341.17	7.49565	22.1878	15.981	34.774	6.19028	0.334168	4.47955	2.14312	3.81351	5.00634	9.79511	3.44995	1.7794	9.19826	2.77475	1.05469	0.215139	0.355561	1.21113	0.971053	0.927907	8.6506	6.74812	1.30095	5.75976	13.1727	2.5761	2.28369	0.939732	2.05513	3.49659	1.46885	5.42959
3	2	2	1	1	5637.65	779.874	7.76203	23.6371	16.8532	37.0584	6.3	0.342755	2.67174	2.37451	4.07436	6.25686	12.7553	5.5469	2.38196	9.80656	3.62408	1.33359	1.22896	1.36585	2.2375	2.34456	2.24833	6.14811	3.66278	0.96864	2.22145	9.57904	1.41707	1.1689	0.579672	1.44773	1.14391	1.13456	2.59748
3	2	2	1	2	6784.35	947.346	9.06261	27.2858	21.1116	44.8875	6.924	0.362484	3.43228	2.95275	4.30888	8.89762	13.2764	6.09467	2.51628	10.9921	4.94914	1.12242	1.27203	1.42439	2.3875	2.44173	2.43112	5.93239	4.3519	1.12362	2.85992	9.96892	1.77513	1.59628	0.71771	1.54859	1.47316	1.30677	2.99843
3	2	2	2	1	6034.15	837.847	8.59252	26.1437	19.0191	39.7686	6.6588	0.365148	3.05786	2.70986	4.34054	9.27588	13.9847	6.27386	2.5508	10.217	4.69185	1.45312	1.29641	1.39951	2.32375	2.69524	2.452	5.6841	4.74196	1.05775	3.05427	8.7339	1.59919	1.38882	0.650701	1.54713	1.75852	1.24599	2.87294
3	2	2	2	2	7152.26	942.988	9.376	32.6218	22.1377	46.0989	7.1008	0.382362	3.60385	3.11468	4.54517	6.33024	11.4709	6.32872	2.57936	11.1756	4.30591	1.53281	0.312669	0.440976	2.43	2.58708	1.53112	6.82637	5.002	1.16753	3.75401	10.7923	1.57573	1.5133	0.690906	1.47138	1.78645	1.35742	3.58481
3	2	3	1	1	4214.03	611.531	9.8043	37.6231	23.5401	53.6589	7.43796	0.409529	2.50316	3.23675	4.8681	10.5611	14.7367	3.68056	2.74719	12.0346	5.30078	1.64172	1.33488	1.48803	2.55058	2.0362	1.96823	5.14204	3.07998	0.732981	1.29914	7.48759	0.910972	0.652995	0.413044	1.55545	1.88822	0.84079	1.81472
3	2	3	1	2	4837.32	704.245	10.8198	47.9012	25.4304	62.7467	7.91529	0.425545	2.925	3.86064	5.05961	11.0185	15.1018	4.47093	2.99093	12.9991	5.37116	1.67727	1.36483	1.51738	2.62579	2.22456	2.16512	4.69663	3.38107	0.893818	1.38661	8.37567	1.01081	0.88121	0.486753	1.71932	2.00371	1.04339	1.92157
3	2	3	2	1	4293.76	625.335	10.7657	40.7932	23.9978	60.9717	7.88479	0.435863	2.59925	4.03192	5.30339	13.185	15.3733	3.95416	3.2716	13.2679	5.41556	1.78852	1.34214	1.51452	2.61846	2.14851	2.09395	3.80181	3.00222	0.789162	1.53417	5.71578	1.11797	1.079	0.550635	1.61218	2.3851	0.98261	2.01685
3	2	3	2	2	5114.2	731.009	12.3282	49.4093	30.6374	65.6487	7.70243	0.451774	3.30087	4.20195	5.73026	14.8158	15.3668	4.45037	3.59573	13.4217	7.08041	2.19289	1.44731	1.49137	2.55912	2.27526	2.21256	1.14115	3.44175	0.941389	2.1867	1.8162	1.36392	1.09836	0.556889	1.74468	2.00033	1.09404	2.43822
